# Supplementary material
Source: MDPI journal article supplement (https://www.mdpi.com/2673-6373/2/2/14)
Supplement: s1 [file s1]

## **SUPPLEMENT – English translation of the web event program and list of communications**

### **EVENT PROGRAM AND LIST OF SCIENTIFIC COMMUNICATIONS**

Event presentation: *Oscar Bertetto, Michele Mignogna*

### **COMPARISON OF GUIDELINES AND RECOMMENDATIONS**

Chairmen: *Michele Mignogna, Umberto Romeo*

9.05 Guidelines ASCO / ISOO / MASCC 2019 *Noam Yarom*

9.20 The 2019 European document *Sven Otto*

9.35 European Consensus: work in progress *Alberto Bedogni*

9.50 Italian Recommendations SIPMO-SICMF 2020 *Giuseppina Campisi*

10.05 Questions /answers (from the chat) *Vittorio Fusco e Umberto Romeo*

10.15 Round Table 1

Clinical practice and scientific reports: which definition? which staging system?

Chairmen: *Alberto Bedogni, Giuseppina Campisi*

Panelists:

*Luigi Califano, Gianfranco Favia, Amerigo Giudice, Claudio Marchetti, Marco Nisi, Giacomo Oteri, Andrea Santarelli*

10.45 Round Table 2

The point of view of drug prescribers

Chairmen: *Vittorio Fusco, Lorenzo Lo Muzio*

Panelists:

*Francesco Bertoldo, Paolo Bossi, Monica Fornier, Roberto Freilone, Marco Ladetto, Gaetano Lanzetta, Emanuela Palmerini, Maurizio Rossini, Daniele Santini*

### **Faculty**

Oscar Bertetto, Turin – Italy

Noam Yarom, Tel Aviv – Israel

Alberto Bedogni, Padova – Italy

Giuseppina Campisi, Palermo – Italy

Vittorio Fusco, Alessandria – Italy

Amerigo Giudice, Catanzaro – Italy

Gianfranco Favia, Bari – Italy

Paolo Bossi, Brescia – Italy

Luigi Califano, Naples – Italy

Francesco Bertoldo, Verona – Italy

Roberto Freilone, Turin – Italy

Monica Fornier, New York - USA

Claudio Marchetti, Bologna – Italy

Lorenzo Lo Muzio, Foggia – Italy

Gaetano Lanzetta, Grottaferrata (Rome) – Italy

Emanuela Palmerini, Bologna – Italy

Marco Ladetto, Alessandria – Italy

Daniele Santini, Rome – Italy

Maurizio Rossini, Verona – Italy

Giacomo Oteri, Messina – Italy

Sven Otto, Munich - Germany

Michele Mignogna, Naples – Italy

Umberto Romeo, Rome- Italy  
Marco Nisi, Pisa – Italy  
Andrea Santarelli, Ancona – Italy

## **ONJ: 2020 ITALIAN RECOMMENDATIONS BY SICMF-SIPMO - VERSION 2.0** **DIFFERENCES IN COMPARISON WITH 2013 VERSION**

Chairmen: *Alberto Bedogni, Giuseppina Campisi*

11.15 Definition and diagnosis - Imaging and staging *Olga Di Fede*

Prevention measures and dental management of patients at risk of MRONJ *Rodolfo Mauceri*

Treatment of MRONJ *Paolo Vescovi*

12.00 **LECTURE:** Supportive care in Oncology *Oscar Bertetto*

12.30 Lunch break

## **SELECTED ORAL COMMUNICATIONS**

14.30

Chairmen and reviewers:

*Paolo Arduino, Pierantonio Bellini, Matteo Biasotto, Giuseppe Colella, Antonella Fasciolo, Vittorio Fusco, Michele Giuliani, Alessandra Majorana, Maddalena Manfredi, Mario Migliario, Vera Panzarella, Monica Pentenero*

1. MRONJ case series (at least 10 cases) and epidemiological studies;
2. Case reports / recent issues;
3. MRONJ prevention and follow-up experiences;
4. MRONJ treatment experience reports (at least 10 cases);
5. Miscellanea.

Paolo Arduino, Turin – Italy  
Matteo Biasotto, Trieste – Italy  
Olga Di Fede, Palermo – Italy  
Giuseppe Colella, Naples – Italy  
Pierantonio Bellini, Modena – Italy  
Alberto Bedogni, Padua – Italy – Italy  
Giuseppina Campisi, Palermo – Italy  
Antonella Fasciolo, Alessandria – Italy  
Vittorio Fusco, Alessandria – Italy  
Michele Giuliani, Foggia – Italy  
Alessandra Majorana, Brescia – Italy  
Maddalena Manfredi, Parma – Italy  
Mario Migliario, Novara – Italy  
Vera Panzarella, Palermo – Italy  
Monica Pentenero, Orbassano (Turin) – Italy  
Rodolfo Mauceri, Palermo – Italy  
Paolo Vescovi, Parma – Italy

## **ORAL PRESENTATIONS AND QEIOS PAPERS**

Seven 8-minute oral communications

| Number | First Author (and/or speaker) | Title (First words) ...                                                                | Qeios publication                                                             |
|--------|-------------------------------|----------------------------------------------------------------------------------------|-------------------------------------------------------------------------------|
| A1     | Ahcene-Djaballah              | Medication-related osteonecrosis of the jaw in patients...                             | <a href="https://doi.org/10.32388/4AKYSB">https://doi.org/10.32388/4AKYSB</a> |
| A2     | Cabras                        | Survival of metastatic cancer patients and myeloma after diagnosis of Osteonecrosis... | <a href="https://doi.org/10.32388/IKLIWH">https://doi.org/10.32388/IKLIWH</a> |
| A3     | Poropat                       | MULTIDISCIPLINARY APPROACH TO MEDICATION-RELATED OSTEONECROSIS OF THE JAW....          | <a href="https://doi.org/10.32388/W2GCUH">https://doi.org/10.32388/W2GCUH</a> |
| A4     | Mauceri                       | Histological findings of osteonecrosis spotted prior to tooth extractions....          | <a href="https://doi.org/10.32388/JK459H">https://doi.org/10.32388/JK459H</a> |
| A5     | Mosaico                       | A primary prevention strategy: oral hygiene and correct lifestyles....                 | <a href="https://doi.org/10.32388/BGMWYJ">https://doi.org/10.32388/BGMWYJ</a> |
| A6     | Bettini                       | CURATIVE RATES OF MEDICATION-RELATED OSTEONECROSIS OF THE JAW...                       | <a href="https://doi.org/10.32388/LVB61W">https://doi.org/10.32388/LVB61W</a> |
| A7     | De Francesco                  | "Drug holiday" in DRONJ (Denosumab Related Osteonecrosis of the Jaws) ...              | <a href="https://doi.org/10.32388/T8Q4Z9">https://doi.org/10.32388/T8Q4Z9</a> |

### LIST OF ALL COMMUNICATIONS

#### **1. MRONJ case series (at least 10 cases) and epidemiological studies;**

**A1. Selma Ahcene-Djaballah (Padua)**

**Medication-related osteonecrosis of the jaw in patients...**

**A3. Marco Cabras (Rete Oncologica Piemonte V.d'Aosta)**

**Survival of metastatic cancer patients and myeloma after diagnosis of Osteonecrosis...**

|                    |                 |                                    |   |                                                                       |                                                                               |
|--------------------|-----------------|------------------------------------|---|-----------------------------------------------------------------------|-------------------------------------------------------------------------------|
| Giacomo Setti      | Modena          | setti.giacomo@gmail.com ;          | 1 | Incidence and treatment of MR-ONJ in a cohort of oncological patients | <a href="https://doi.org/10.32388/O4EIE8">https://doi.org/10.32388/O4EIE8</a> |
| Marco Frontera     | Parma           | marco.frontera@studenti.unipr.it ; | 1 | MRONJ and implants: the risk of developing necrosis away from surgery | <a href="https://doi.org/10.32388/9A5288">https://doi.org/10.32388/9A5288</a> |
| Emanuela Palmerini | Bologna Rizzoli | emanuela.palmerini@ior.it ;        | 1 | Osteonecrosis of the jaw (ONJ) after denosumab in                     | <a href="https://doi.org/10.32388/YY8GE9">https://doi.org/10.32388/YY8GE9</a> |

|                |        |                                     |   |                                                                                                                              |                                                                               |
|----------------|--------|-------------------------------------|---|------------------------------------------------------------------------------------------------------------------------------|-------------------------------------------------------------------------------|
|                |        |                                     |   | patients with giant cell tumour of bone (GCTB): a single institution analysis of a prospective, international study 20062004 |                                                                               |
| Lucrezia Togni | Ancona | andrea.santarelli@staff.univpm.it ; | 1 | Denosumab-Related Osteonecrosis of the Jaw: a five year monocentric retrospective study of Ancona General Hospital           | <a href="https://doi.org/10.32388/J24000">https://doi.org/10.32388/J24000</a> |

|                    |                        |                            |   |                                                                                                                                                                                                  |                                                                               |
|--------------------|------------------------|----------------------------|---|--------------------------------------------------------------------------------------------------------------------------------------------------------------------------------------------------|-------------------------------------------------------------------------------|
| Marco Cabras       | Torino Rete Oncologica | cabrasmarco300@gmail.com ; | 1 | OSTEONECROSIS OF THE JAW (ONJ) IN CANCER AND MYELOMA PATIENTS. A 16-YEAR EXPERIENCE OF "RETE ONCOLOGICA PIEMONTE-VALLE D'AOSTA" CANCER NETWORK                                                   | <a href="https://doi.org/10.32388/YIVAW8">https://doi.org/10.32388/YIVAW8</a> |
| Alessio Gambino    | Torino Rete Oncologica | alegam33@hotmail.it ;      | 1 | OSTEONECROSIS OF JAW (ONJ) IN PATIENTS WITH OSTEOPOROSIS AND OTHER NON-MALIGNANT DISEASES IN PIEDMONT AND AOSTA VALLEY 2004-2018                                                                 | <a href="https://doi.org/10.32388/RFSJ8T">https://doi.org/10.32388/RFSJ8T</a> |
| Antonella Fasciolo | Alessandria            | afasciolo@ospedale.al.it ; | 1 | Prevention and screening of Osteonecrosis of Jaw (ONJ): the Alessandria experience of a multidisciplinary team on a 900 patient population                                                       | <a href="https://doi.org/10.32388/0QK8E2">https://doi.org/10.32388/0QK8E2</a> |
| Vittorio Fusco     | Torino Rete Oncologica | vfusco@ospedale.al.it      | 1 | Expected survival of cancer patients and myeloma undergoing bisphosphonates or denosumab. Possible impact on diagnosis and management of Osteonecrosis of Jaws (ONJ).                            | <a href="https://doi.org/10.32388/MQ2IYG">https://doi.org/10.32388/MQ2IYG</a> |
| Pamela Pignatelli  | Roma                   |                            | 1 | A SINGLE REFERENCE CENTER, 2 YEARS RETROSPECTIVE STUDY ON THE RISK FACTORS ASSOCIATED WITH ANTI-RESORPTIVE MEDICATION-RELATED OSTEONECROSIS OF THE JAWS IN OSTEOPOROTIC AND ONCOLOGICAL PATIENTS | <a href="https://doi.org/10.32388/LPILZ7">https://doi.org/10.32388/LPILZ7</a> |

## **2. Case reports / recent issues**

### **A3. Augusto Poropat (Trieste)**

#### **MULTIDISCIPLINARY APPROACH TO MEDICATION-RELATED OSTEONECROSIS OF THE JAW: REPORT OF A CASE**

|                                      |         |                              |   |                                                                                |                                                                               |
|--------------------------------------|---------|------------------------------|---|--------------------------------------------------------------------------------|-------------------------------------------------------------------------------|
| Martina Iurato (per Vera Panzarella) | Palermo | panzarella@odonto.unipa.it ; | 2 | Oral squamous cell carcinoma mimicking osteonecrosis of the jaw: a case report | <a href="https://doi.org/10.32388/IC2QDS">https://doi.org/10.32388/IC2QDS</a> |
|--------------------------------------|---------|------------------------------|---|--------------------------------------------------------------------------------|-------------------------------------------------------------------------------|

|                                       |                   |                                                                              |   |                                                                                                                                     |                                                                                    |
|---------------------------------------|-------------------|------------------------------------------------------------------------------|---|-------------------------------------------------------------------------------------------------------------------------------------|------------------------------------------------------------------------------------|
| )                                     |                   |                                                                              |   |                                                                                                                                     |                                                                                    |
| Stefania Nespoli                      | Brescia           | stefi.nespoli@gmail.com ;                                                    | 2 | MRONJ ASSOCIATED WITH DENTAL INFECTION AND SECONDARY INVOLVEMENT OF THE NEARBY IMPLANT: A CASE REPORT                               | <a href="https://doi.org/10.32388/U22PV1.3">https://doi.org/10.32388/U22PV1.3</a>  |
| Maura Rossi                           | Alessandria       | mrossi@ospedale.al.it ;                                                      | 2 | OSTEONECROSIS OF THE JAW (ONJ) IN DIFFERENTIATED THYROID CANCER (DTC): A CASE REPORT AFTER ZOLEDRONIC ACID AND LENVATINIB TREATMENT | <a href="https://doi.org/10.32388/IRMCKI">https://doi.org/10.32388/IRMCKI</a>      |
| Francesco Della Ferrara               | Torino Mauriziano | frankiedef86@gmail.com ;                                                     | 2 | M-TOR INHIBITORS & MRONJ. POSSIBLE ROLE OF EVEROLIMUS IN A CASE OF RECURRENT MANDIBULAR OSTEONECROSIS                               | <a href="https://doi.org/10.32388/N28V7X">https://doi.org/10.32388/N28V7X</a>      |
| Martina Murgia (per Cinzia Casu)      | Cagliari          | ginzia.85@hotmail.it                                                         | 2 | A PARTICULAR PHOTODYNAMIC THERAPY FOR THE TREATMENT OF REFRACTORY SPONTANEOUS MAXILLARY ONJ: A CASE REPORT                          | <a href="https://doi.org/10.32388/GG5SAP">https://doi.org/10.32388/GG5SAP</a>      |
| Lia Ester Argiolas                    | Cagliari          | martina.murgia.s@gmail.com ;<br>liaester.argiolas@gmail.com                  | 2 | DEVELOPMENT OF MRONJ IN A FEMALE PATIENT WITH MULTIPLE MYELOMA AFTER 10 YEARS OF IMPLANTS REHABILITATION: A CASE REPORT             | <a href="https://doi.org/10.32388/VY85N7">https://doi.org/10.32388/VY85N7</a>      |
| Martina Murgia (per Raffaello Viganò) | Cagliari          | martina.murgia.s@gmail.com                                                   | 2 | B.P.F.C PURE GROWTH FACTOR, PDT AND LLLT FOR THE TREATMENT OF SEVERE MRONJ NON-RESPONSIVE TO PROLONGED ANTIBIOTIC THERAPY           | <a href="https://doi.org/10.32388/43BHE">https://doi.org/10.32388/43BHE</a>        |
| Anna Maria Agnone (per Paolo Boffano) | Vercelli          | Paolo Boffano                                                                |   | Bilateral ONJ in a patient affected by metastatic prostate adenocarcinoma                                                           | <a href="https://doi.org/10.32388/3HWSOZ">https://doi.org/10.32388/3HWSOZ</a> )    |
| Francesco Pavese                      | L'Aquila          | <a href="mailto:francesco.pavese@outlook.it">francesco.pavese@outlook.it</a> | 2 | Use of Radium 223 in metastatic prostate cancer patient in treatment the denosumab: a potential trigger for ONJ? A case report      |                                                                                    |
| Paolo Boffano                         | Novara            |                                                                              |   | Oral hygiene and ONJ: a proposal of protocol.<br><a href="https://doi.org/10.32388/7TDJFH">https://doi.org/10.32388/7TDJFH</a>      | <a href="https://doi.org/10.32388/7TDJFH">https://doi.org/10.32388/7TDJFH</a><br>H |

### **3. MRONJ prevention and follow-up experiences;**

#### **A4. Rodolfo Mauceri (Palermo)**

"Histological findings of osteonecrosis spotted prior to tooth extractions. Should we consider tooth extraction still the main trigger event?".

#### **A5. Giovanna Mosaico (Brindisi)**

**A primary prevention strategy: oral hygiene and correct lifestyles among patients at risk of developing drug-related osteonecrosis of the Jaw**

|                         |                   |                                                                   |   |                                                                                                                                                       |                                                                                   |
|-------------------------|-------------------|-------------------------------------------------------------------|---|-------------------------------------------------------------------------------------------------------------------------------------------------------|-----------------------------------------------------------------------------------|
| Giorgia Capocasale      | Verona            | capocasalegiorgia@gmail.com ;                                     | 3 | Prevention of Medication-related Osteonecrosis of the Jaw (MR-ONJ) after dentoalveolar surgery in cancer patients: one year experience                | <a href="https://doi.org/10.32388/TTPEZS">https://doi.org/10.32388/TTPEZS</a>     |
| Silvia Leone            | Novara Odonto     | mario.migliario                                                   | 3 | ORAL HEALTH STATUS IN A COHORT OF 114 CANCER PATIENTS IN ADJUVANT THERAPY TREATED BY DENOSUMAB                                                        | <a href="https://doi.org/10.32388/0WMLJX.2">https://doi.org/10.32388/0WMLJX.2</a> |
| Fabio Lonardi           | Verona            | fabio.lonardi@univr.it ; capocasalegiorgia@gmail.com ;            | 3 | Dentoalveolar surgery and Prevention of Medication-related Osteonecrosis of the Jaw (MR-ONJ) in patients treated with Bisphosphonates: our experience | <a href="https://doi.org/10.32388/6CCLYF">https://doi.org/10.32388/6CCLYF</a>     |
| Francesco Della Ferrera | Torino Mauriziano | frankiedef86@gmail.com ;                                          | 3 | DENTAL EXTRACTION & DENOSUMAB. EVALUATION OF PIEZOELECTRIC SURGICAL PROTOCOL FOR MRONJ PREVENTION. PRELIMINARY REPORT.                                | <a href="https://doi.org/10.32388/KYKMMJ">https://doi.org/10.32388/KYKMMJ</a>     |
| Katia Rupel             | Trieste           | krupel@units.it ; M.BIASOTTO@fmc.units.it ; gottaviani@units.it ; | 3 | MRONJ ONSET AFTER PRELIMINARY EVALUATION AND PREVENTIVE INTERVENTIONS - A SINGLE CENTER STUDY                                                         | <a href="https://doi.org/10.32388/MZJDOX">https://doi.org/10.32388/MZJDOX</a>     |

|                                  |                       |                                  |   |                                                                                                                              |                                                                                   |
|----------------------------------|-----------------------|----------------------------------|---|------------------------------------------------------------------------------------------------------------------------------|-----------------------------------------------------------------------------------|
| Cristina Mirelli                 | Milano Policlinico    | mirelli.cristina@virgilio.it ;   | 3 | Prevention of MRONJ in non-oncological patients on antiresorptive drugs therapy: the pivotal role of past medical history.   | <a href="https://doi.org/10.32388/UI1JBH">https://doi.org/10.32388/UI1JBH</a>     |
| Andrea Melle (per Paolo Boffano) | Vercelli              | Paolo boffano                    | 3 | Oral hygiene and ONJ: a review of the literature                                                                             | <a href="https://doi.org/10.32388/6JMXXL">https://doi.org/10.32388/6JMXXL</a>     |
| Paolo Boffano                    | Vercelli              |                                  | 3 | Oral hygiene and ONJ: a proposal of protocol                                                                                 | <a href="https://doi.org/10.32388/7TDJFH">https://doi.org/10.32388/7TDJFH</a>     |
| Gianluca Colapinto               | Acquaviva delle Fonti | colapinto.gianluca@virgilio.it ; | 3 | Osteometabolic profile: a possible tool in decision making for implant rehabilitation in patients under antiresorptive drugs | <a href="https://doi.org/10.32388/BCIX7F">https://doi.org/10.32388/BCIX7F</a>     |
| Federica Pezzotti                | Novara                | Mario migliario                  | 3 | DENTAL AND PERIODONTAL HEALTH IN BREAST CANCER WOMEN IN ADJUVANT HORMONE THERAPY                                             | <a href="https://doi.org/10.32388/1K09I5.2">https://doi.org/10.32388/1K09I5.2</a> |

#### 4. MRONJ treatment experience reports (at least 10 cases);

**A6. Giordana Bettini (Padua)**

**CURATIVE RATES OF MEDICATION-RELATED OSTEONECROSIS OF THE JAW FOLLOWING APPLICATION OF THE SICMF-SIPMO SURGICAL TREATMENT ALGORITHM**

**A7. Pierpaolo De Francesco (Parma).**

**“Drug holiday” in DRONJ (Denosumab Related Osteonecrosis of the Jaws) patients: real benefit in surgical or nonsurgical therapeutic approach?**

|                            |                             |                                         |   |                                                                                                                   |                                                                                   |
|----------------------------|-----------------------------|-----------------------------------------|---|-------------------------------------------------------------------------------------------------------------------|-----------------------------------------------------------------------------------|
| Davide Caruso              | Catanzaro                   | carusodavide81@gmail.com ;              | 4 | OXIDIZED CELLULOSE WRAP IN SECONDARY INTENTION HEALING OF THE ORAL MUCOSA IN THE TREATMENT OF ONJ                 | <a href="https://doi.org/10.32388/PPSJH5">https://doi.org/10.32388/PPSJH5</a>     |
| Stefano Negrini            | Brescia                     | stefano.negrini@asst-spedalicivili.it ; | 4 | SURGICAL TREATMENT OF MEDICATION-RELATED OSTEONECROSIS OF THE JAW: TECHNICAL REPORT AND PROGNOSIS ASSESSMENT      | <a href="https://doi.org/10.32388/AWN86A">https://doi.org/10.32388/AWN86A</a>     |
| Francesco Ricotta          | Bologna<br>Maxillofacciale  | francesco.ricotta@aosp.bo.it ;          | 4 | The use of platelet rich plasma in the management of medication-related osteonecrosis of the jaws: a cohort study | <a href="https://doi.org/10.32388/9CKOR9.2">https://doi.org/10.32388/9CKOR9.2</a> |
| Matteo Val                 | Treviso                     | matteo.val@aulss2.veneto.it ;           | 4 | Human amniotic membrane in the treatment of MRONJ                                                                 | <a href="https://doi.org/10.32388/5HD92I">https://doi.org/10.32388/5HD92I</a>     |
| Xxxx (per Christian Bacci) | Padova<br>(Patologia Orale) | christian.bacci@unipd.it ;              | 4 | Safety and efficacy of sectorial resection with piezoelectric device in ONJ                                       | <a href="https://doi.org/10.32388/HSVZKX">https://doi.org/10.32388/HSVZKX</a>     |

|                    |                           |                                     |   |                                                                                                                |                                                                               |
|--------------------|---------------------------|-------------------------------------|---|----------------------------------------------------------------------------------------------------------------|-------------------------------------------------------------------------------|
| Paolo Garzino-Demo | Torino<br>Maxillofacciale | paolo.garzinodemo@unito.it ;        | 4 | Difference in outcomes in surgical treatment of stage II-II MRONJ in oncological and non-oncological patients  | <a href="https://doi.org/10.32388/7BRQ27">https://doi.org/10.32388/7BRQ27</a> |
| Stefano Franchi    | Novara<br>Maxillofacciale | stefano01.franchi@gmail.com ;       | 4 | Management of Medication-Related Osteonecrosis of the Jaws: a monoinstitutional experience                     | <a href="https://doi.org/10.32388/65E5F6">https://doi.org/10.32388/65E5F6</a> |
| Girolamo Donati    | Milano Sacco              | girolamo.donati@asst-fbf-sacco.it ; | 4 | Oxygen/Ozone Therapy: a promising approach for the treatment of biphosphonate-related osteonecrosis of the jaw | <a href="https://doi.org/10.32388/OE5QO4">https://doi.org/10.32388/OE5QO4</a> |
| Francesco Erovigni | Torino<br>Dental School   |                                     | 4 | PHOTOBIO-MODULATION VS PHOTODYNAMIC THERAPY AS ADJUVANT TREATMENTS IN PATIENTS WITH MEDICATION-                | <a href="https://doi.org/10.32388/RF5D4G">https://doi.org/10.32388/RF5D4G</a> |

|  |  |  |  |                                                         |  |
|--|--|--|--|---------------------------------------------------------|--|
|  |  |  |  | RELATED OSTEONECROSIS OF THE JAW (MRONJ): A PILOT STUDY |  |
|--|--|--|--|---------------------------------------------------------|--|

## 5. **Miscellanea, imaging, staging**

|                      |                          |                                  |   |                                                                                                                                                   |                                                                                   |
|----------------------|--------------------------|----------------------------------|---|---------------------------------------------------------------------------------------------------------------------------------------------------|-----------------------------------------------------------------------------------|
| Ilaria Roato         | Torino - Università      | ilaria.roato@unito.it ;          | 5 | Evaluation of the immune state activation in patients affected by ONJ: preliminary data                                                           | <a href="https://doi.org/10.32388/8D667H">https://doi.org/10.32388/8D667H</a>     |
| Alessandro Antonelli | Catanzaro                | antonellicz@gmail.com ;          | 5 | CLINICAL AND RADIOLOGICAL FEATURES OF MEDICATION-RELATED OSTEONECROSIS OF THE JAWS: COMPARISON OF STAGING SYSTEMS                                 | <a href="https://doi.org/10.32388/C9KVWL">https://doi.org/10.32388/C9KVWL</a>     |
| Giulia Ghidini       | Parma                    | ghidinigiulia@gmail.com ;        | 5 | Prevalence of late stage in 507 Medication-related osteonecrosis of the jaws (MRONJ) sites: comparison between cancer and osteometabolic patients | <a href="https://doi.org/10.32388/9YP1EV.2">https://doi.org/10.32388/9YP1EV.2</a> |
| Federica Rocchetti   | Roma Sapienza            | federica.rocchetti@uniroma1.it ; | 5 | DIAGNOSTIC ACCURACY OF BONE SCINTIGRAPHY IN THE EARLY PREDICTION OF MRONJ                                                                         | <a href="https://doi.org/10.32388/7H6PHY">https://doi.org/10.32388/7H6PHY</a>     |
| Agostino Guida       | Napoli Istituto Pascale  | a.guida@istitutotumori.na.it ;   | 5 | New-generation anticancer drugs and medication-related osteonecrosis of the jaw (MRONJ): review of the literature and single-center experience    | <a href="https://doi.org/10.32388/48DL31">https://doi.org/10.32388/48DL31</a>     |
| Martina Gangà        | Università dell'Insubria |                                  | 5 | "Psychological, communicative and relational aspects in antiresorptive drug therapy"                                                              | <a href="https://doi.org/10.32388/FJIOZP">https://doi.org/10.32388/FJIOZP</a>     |

## OTHER COMMUNICATIONS (NON PRESENTED ORALLY)

|                                    |             |  |                                                                                                                                         |                                                                               |
|------------------------------------|-------------|--|-----------------------------------------------------------------------------------------------------------------------------------------|-------------------------------------------------------------------------------|
| Silvia Arrigoni, Riccardo Bonacina | Bergamo     |  | Difficult management of severe Medication-Related Osteonecrosis of the Jaws in a denosumab treated osteoporotic patient, a case report. | <a href="https://doi.org/10.32388/R75CTY">https://doi.org/10.32388/R75CTY</a> |
| Vittorio Fusco                     | Alessandria |  | 18F-Choline PET-CT: a potential adjuvant tool for early diagnosis of Osteonecrosis of the Jaw (ONJ) in prostate cancer patients?        | <a href="https://doi.org/10.32388/TUEHC">https://doi.org/10.32388/TUEHC</a>   |
| Giulia Limberti                    | Alessandria |  | PREVENTION AND SCREENING OF OSTEONECROSIS OF JAW (ONJ) IN                                                                               | <a href="https://doi.org/10.32388/R0TL9Y">https://doi.org/10.32388/R0TL9Y</a> |



|                    |             |                                                                                                                                                |                                                                               |
|--------------------|-------------|------------------------------------------------------------------------------------------------------------------------------------------------|-------------------------------------------------------------------------------|
|                    |             | MYELOMA PATIENTS : A MONOINSTITUTIONAL FIFTEEN-YEAR EXPERIENCE                                                                                 |                                                                               |
| Federico Monaco    | Alessandria | SURVIVAL OF MYELOMA PATIENTS RECEIVING BISPHOSPHONATES IN A "REAL LIFE" EXPERIENCE: POTENTIAL IMPACT ON RISK OF OSTEONECROSIS OF THE JAW (ONJ) | <a href="https://doi.org/10.32388/ZTQIGK">https://doi.org/10.32388/ZTQIGK</a> |
| Elisabetta Ferrero | Alessandria | ROLE OF NURSES IN A MULTISCIPLINARY TEAM MANAGING PATIENTS AT RISK FOR OSTEONECROSIS OF JAW (ONJ): A FIFTEEN-YEAR EXPERIENCE                   | <a href="https://doi.org/10.32388/B2V21B">https://doi.org/10.32388/B2V21B</a> |

|                  |             |                                                                                                                                                                                                |                                                                               |
|------------------|-------------|------------------------------------------------------------------------------------------------------------------------------------------------------------------------------------------------|-------------------------------------------------------------------------------|
| Giovanna Mosaico | Brindisi    | Medication-related osteonecrosis of the jaw: prevention and medical-surgical management through low-level laser therapy with different wavelengths                                             | <a href="https://doi.org/10.32388/6GYPQ">https://doi.org/10.32388/6GYPQ</a>   |
| Vittorio Fusco   | Alessandria | DENOSUMAB-RELATED OSTEONECROSIS OF JAW (ONJ) VERSUS ZOLEDRONIC ACID-RELATED ONJ: DIFFERENT CHARACTERISTICS AT COMPUTED TOMOGRAPHY SCAN EVALUATION? A PROPOSAL OF STUDY                         |                                                                               |
| Paola Brigo      | Alessandria | OSTEONECROSIS OF THE JAW (ONJ) IN BREAST CANCER PATIENTS: EFFECT OF PREVENTIVE MEASURES IN A MONOINSTITUTIONAL EXPERIENCE                                                                      | <a href="https://doi.org/10.32388/XZI27K">https://doi.org/10.32388/XZI27K</a> |
| Daniela Tartara  | Alessandria | OSTEONECROSIS OF THE JAW (ONJ) IN PROSTATE CANCER PATIENTS: EFFECT OF PREVENTIVE MEASURES IN A MONOINSTITUTIONAL EXPERIENCE                                                                    | <a href="https://doi.org/10.32388/G3BAXG">https://doi.org/10.32388/G3BAXG</a> |
| Vittorio Fusco   | Alessandria | Impact of Osteonecrosis of Jaw (ONJ) on ten-year experience of a multidisciplinary osteoncology team                                                                                           | <a href="https://doi.org/10.32388/1VKTS1">https://doi.org/10.32388/1VKTS1</a> |
| Vittorio Fusco   | Alessandria | A web site page for information about Osteonecrosis of Jaw (ONJ): the Rete Oncologica Piemonte e Valle d'Aosta experience, at <a href="http://www.reteoncologica.it">www.reteoncologica.it</a> | <a href="https://doi.org/10.32388/973TFV">https://doi.org/10.32388/973TFV</a> |

\*\*\*\*\*

**Sunday 9th May 2021**

### **Special session: DENTAL HYGIENE AND ONJ**

Chairmen: *Tiziana Francone, Luigi Morello, Emilia D'Agostino*

10.00 Psychological and communicative issues in antiresorptive drug therapy: patient and professional, two reality face-to-face *Martina Gangale, Michela Rossini, Lorenzo Azzi*

10.20 patients under antiresorptive treatment: operative management *Valentina Zoi, Costanza Frattini, Matteo Biasotto*

10.40 Questions /answers (from the chat) *Vittorio Fusco*

11.00 Biostimulation protocols in the care of ONJ: the role of dental hygienist. *Elisabetta Polizzi, Alessandra Lissoni, Silvio Abati*

11.20 The cancer patients: dental implant and role of hygienists. *Paola Zunino, Paola Gavoglio, Paolo Pera*

11.40 Non-surgical therapy of parodontal disease. . *Paola Carcieri, Francesco Erovigni, Paolo Arduino, Alessandro Dell'Acqua*

12.00 Towards a consensus. *Antonella Abbinante, Giuseppina Campisi, Domenico Tomassi*

12.20 Questions /answers (from the chat) *Vittorio Fusco*

Emilia D'Agostino, Genova – Italy  
Silvio Abati, Milan – Italy  
Giuseppina Campisi, Palermo – Italy  
Costanza Frattini, Trieste – Italy  
Tiziana Francone, Turin – Italy  
Lorenzo Azzi, Varese – Italy  
Francesco Erovigni, Turin – Italy  
Antonella Abbinante, Bari – Italy  
Paolo Arduino, Torino – Italy  
Matteo Biasotto, Trieste – Italy  
Paola Carcieri, Turin – Italy  
Alessandro Dell'Acqua, Torino – Italy  
Paola Zunino, Genova – Italy  
Valentina Zoi, Trieste – Italy  
Elisabetta Polizzi, Milan – Italy  
Michela Rossini, Varese – Italy  
Alessandra Lissoni, Milano – Italy  
Domenico Tomassi, Rome – Italy  
Paolo Pera, Genova – Italy  
Luigi Morello, Alessandria – Italy  
Paola Gavoglio, Genoa – Italy  
Martina Gangale, Varese - Como – Italy  
Vittorio Fusco, Alessandria – Italy

\*\*\*\*\*

Speaks and Oral communications available on YouTube channel :  
[https://www.youtube.com/channel/UCIIX\\_6W0Osex36NqG-xiqTw](https://www.youtube.com/channel/UCIIX_6W0Osex36NqG-xiqTw) .

All **72 received papers** are available on Qeios ,  
at <https://www.qeios.com/topic/articles/ONJ%20UPDATE%202021>
